# Supplementary material for: Biogenic sediments from coastal ecosystems to Beach-Dune Systems: implications for the adaptation of mixed and carbonate beaches to future sea level rise
Source: Copernicus journal article supplement (doi:10.5194/bg-2017-20), 2017-02-20

S1 Table. Grain size (in percent) and CaCO3 content of sediment samples collected from the main depositional environments.


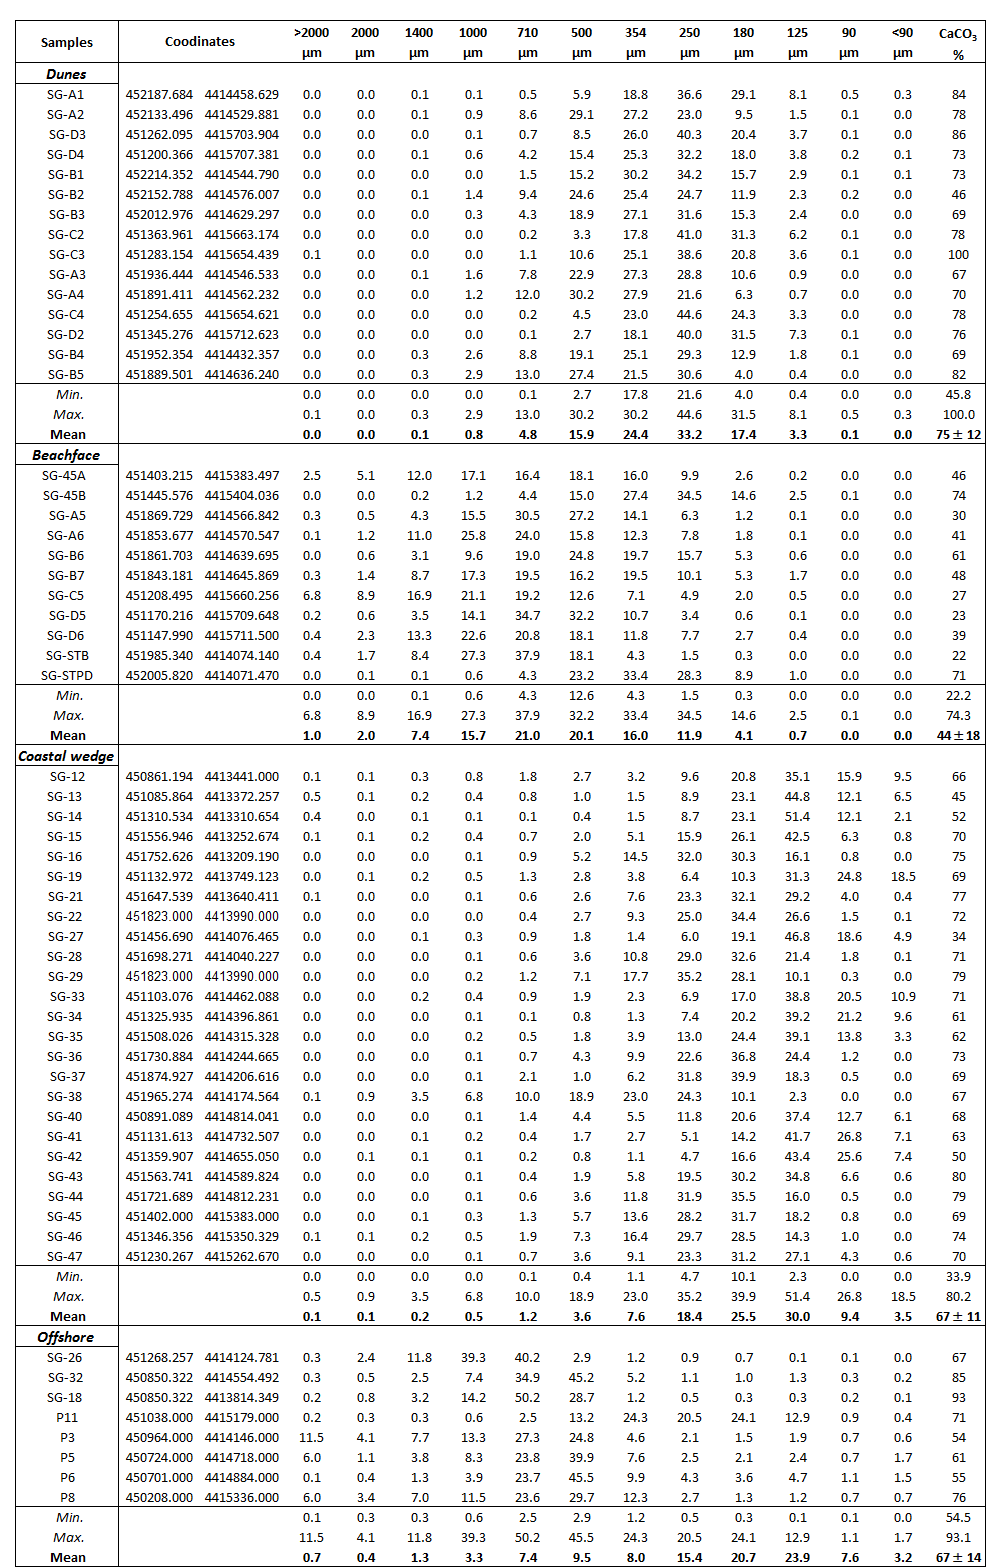

Supplement: Supplementary file 1 [file bg-2017-20-supplement.zip]
