# Supplementary material for: Biogenic sediments from coastal ecosystems to Beach-Dune Systems: implications for the adaptation of mixed and carbonate beaches to future sea level rise
Source: Copernicus journal article supplement (doi:10.5194/bg-2017-20), 2017-02-20

S2 Table. List of the sediment samples collected from the main depositional environments. Percentages of the two principal components obtained by point-counting and classification of bioclasts.


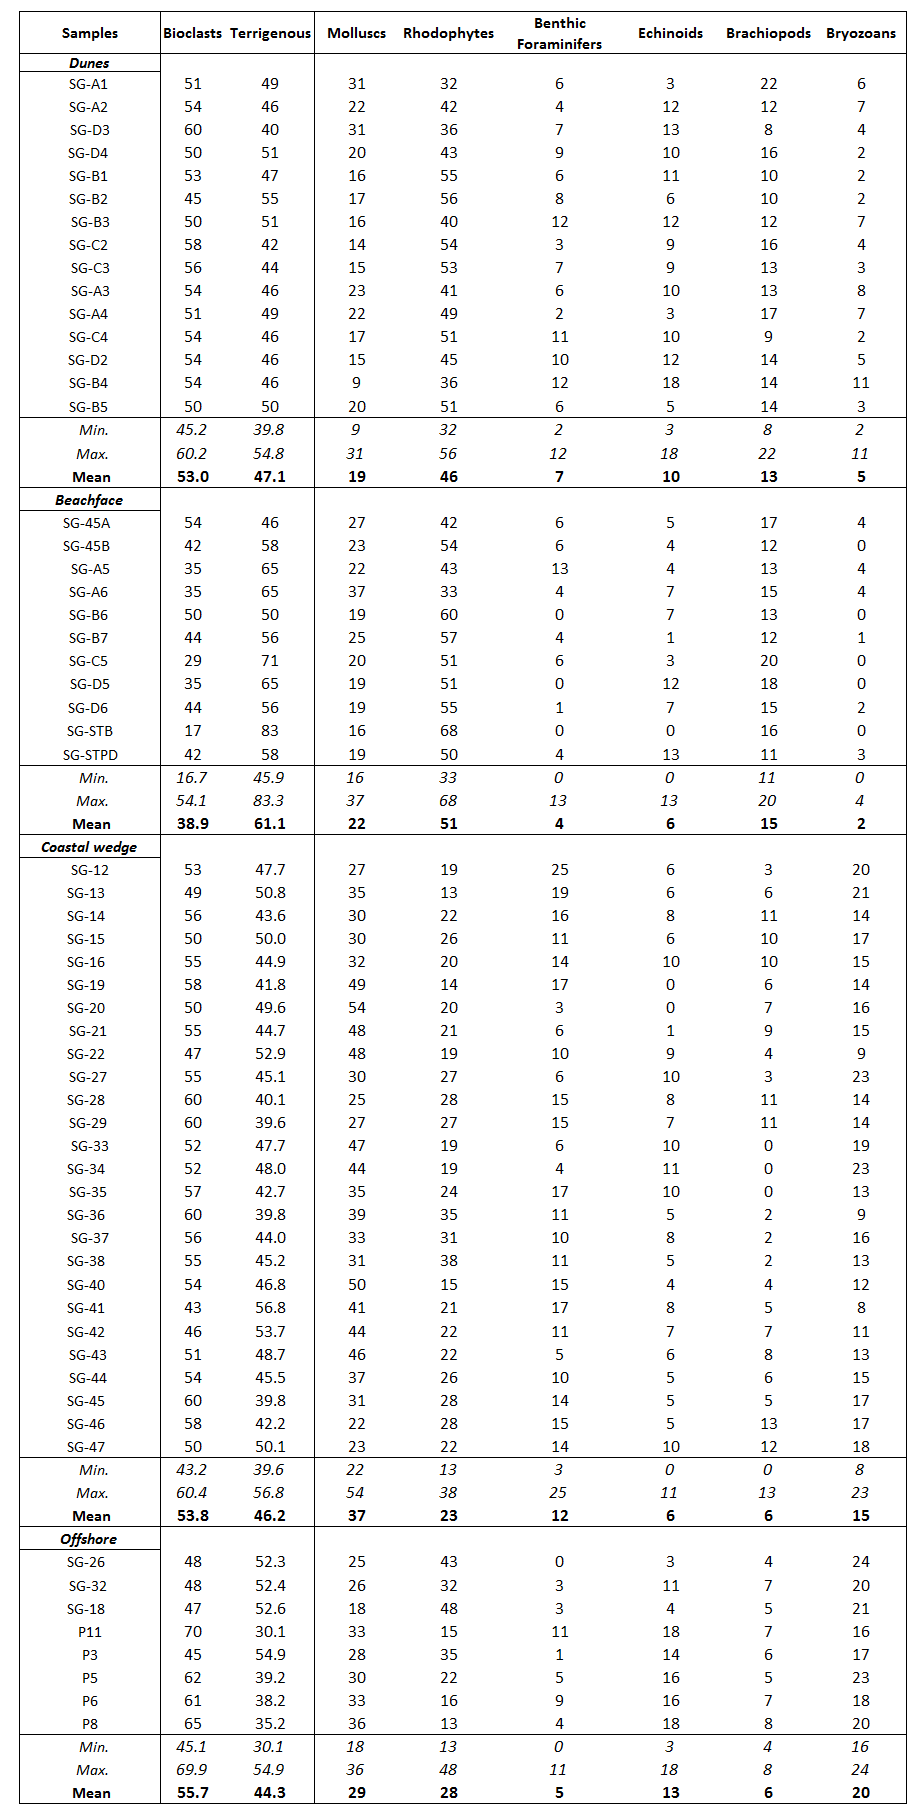

Supplement: Supplementary file 4 [file S2 Table.docx]
